# Supplementary material for: Novel fluorescent biosensor for pathogenic toxins using cyclic polypeptide conjugatesElectronic supplementary information (ESI) available: synthetic approach for microcystin conjugates. See http://www.rsc.org/suppdata/cc/b3/b316057b/
Source: Royal Society of Chemistry journal article supplement (doi:10.1039/b316057b), 2004-01-01
Supplement: b316057b.doc [file b316057b.doc]

*Supplementary Materials for***:**

# Novel Fluorescent Biosensor for Pathogenic Toxins using Cyclic Polypeptide Conjugates

Omowunmi A. Sadik* Fei Yan

**Supplementary Figure 1**: Conjugate synthesis

The steps for the synthesis involve a Michael type addition of thiol available in cysteine to , -unsaturated carbonyl of Mdha in microcystin. MC- LR (500 g) was reacted with Cysteine (750 g) in 5% potassium carbonate aqueous solution with stirring at room temperature. The resulting Cys-MC conjugate was dissolved in 10 mM sodium phosphate buffer (pH 7.4). 300 g fluorescein isothiocyanate solution in 100 l 0.5M sodium carbonate buffer (pH 9.5) was added to the above solution and the reaction was carried out overnight at 4 C with constant agitation. The complex mixture was separated by HPLC after the initial characterization using thin-layer chromatography. The ratio of adducts to microcystin was estimated by measuring the absorbance at appropriate wavelengths. The conjugation was optimized until appropriate ratio was obtained that produces absorbance readings in the range of 0.3 and 1.0. The excess fluorescein isothiocyanate was removed with dialysis tubing (MW cutoff of 1000). The reaction mixture was neutralized with 0.2N hydrochloric acid and applied to an octadecyl stationary phase (ODS) solid-phase extraction column (MetaChem, CA). The column was rinsed with water and then eluted with methanol. In order to characterize MC-Cys conjugate, a Dionex high-performance liquid chromatograph was used. Separation was carried out under reversed-phase isocratic conditions with a Zorbax® C18 column (150  4.6 mm) and a mobile phase of methanol/50mM phosphate buffer (pH3.0) (60:40). Flow rate was 1 ml/min, and UV absorbance at 238 nm was used as the detector.
